# Supplementary material
Source: ML conference proceedings conference paper supplement (https://openaccess.thecvf.com/content/CVPR_2019/html/Tekin_HO_Unified_Egocentric_CVPR_2019_paper.html)
Supplement: Supplementary file 2 [file Tekin_HO_Unified_Egocentric_CVPR_2019_supplemental.zip]

Archive with 2 entries (2 files):
- supplemetary_handplusobject/supp_text_handplusobject.pdf
- supplemetary_handplusobject/supp_video_handplusobject.mp4
